# Supplementary material for: Mixed-ligand ZIF-doped perovskite films toward damp-heat-stable solar cells
Source: Royal Society of Chemistry journal article supplement (doi:10.1039/d5dt02603b), 2025-11-21
Supplement: d5dt02603b1.pdf [file d5dt02603b1.pdf]

**Supplementary Information**

**Mixed-ligand ZIF-doped perovskite films toward  
damp-heat stable solar cells**

Shuaikang Chang,<sup>#,a</sup> Zuoming Jin,<sup>#,a,b</sup> Yu Wang,<sup>#,a</sup> Siyuan Lin,<sup>a</sup> Xueqian Han,<sup>a</sup>

Liqiang Zhang,<sup>a</sup> Yuanqiang Wang,<sup>a</sup> Jia Liang,<sup>b</sup> Yichuan Rui,<sup>\*,a</sup>

*<sup>a</sup>College of Chemistry and Chemical Engineering, Shanghai University of*

*Engineering Science, Shanghai 201620, P. R. China*

*<sup>b</sup>College of Smart Materials and Future Energy, State Key Laboratory of Photovoltaic*

*Science and Technology, Fudan University, 220 Handan Road, Shanghai 200433,*

*China*

*<sup>#</sup>The authors contributed equally to this work.*

*\*E-mail: ryc713@126.com*

## **1. Experimental Section**

### **1.1 Synthesis of ML-ZIF**

The synthesis procedure of ML-ZIF is as follows: 2-MeIM (0.4 g/4.0 mmol) and 2-MIM (0.32 g/4.0 mmol) were dissolved in a mixed solvent of equal volumes ratio of DMF and EtOH (30 mL for each solvent) to obtain a solution A.  $\text{Zn}(\text{NO}_3)_2 \cdot 6\text{H}_2\text{O}$  (0.595 g/2 mmol) was dissolved in an identical mixed solvent as above (30 mL each of DMF and EtOH) to obtain solution B. The solution A was then rapidly poured into the solution B and stirred for 2 h. Subsequently, the mixture was aged without disturbance for 24 h. The resulting ML-ZIF was collected by centrifugation at 8000 rpm, washed with EtOH and water, and finally re-dispersed in DMF for further use.

### **1.2 Preparation of Perovskite Solar Cells**

First, an aqueous  $\text{SnO}_2$  solution (15 wt%) was spin-coated onto FTO (3500 rpm, 30 s), followed by annealing at 150°C for 30 min to obtain the  $\text{SnO}_2$  ETL. Subsequently, 250.4 mg  $\text{PbI}_2$ , 36.7 mg  $\text{PbBr}_2$ , 86.0 mg FAI, 11.2 mg MABr, and 25.8 mg CsI were dissolved in a mixed solvent of 400 mL DMF and 100 mL DMSO. The pre-dispersed ML-ZIF solutions of varying concentrations (0 mg/mL, 0.5 mg/mL, 1.0 mg/mL, and 1.5 mg/mL) were added to prepare MI-ZIF modified perovskite precursor solutions. These perovskite precursor solutions were spin-coated onto the  $\text{SnO}_2$  substrate via a one-step method, which was spin-coated onto the  $\text{SnO}_2$  surface at 4000 rpm for 30 s, with 200  $\mu\text{L}$  chlorobenzene added during the last 10 s, followed by annealing at 105°C for 30 min (Fig. 2a). After natural cooling, Spiro-OMeTAD was spin-coated onto the perovskite film surface at 4000 rpm for 30 s. The Spiro-OMeTAD solution was prepared by dissolving 36.15 mg Spiro-OMeTA, 8.75  $\mu\text{L}$  Li-salt, and 14.4  $\mu\text{L}$  TBP in 550  $\mu\text{L}$  chlorobenzene. After spin-coating, the samples were removed from the glovebox and placed in a dryer for Spiro-OMeTAD oxidation for 12 h. Finally, a 90 nm-thick gold layer was thermally evaporated onto the Spiro-OMeTAD surface to complete the device.

### **1.3 Characterization**

X-ray diffraction (XRD) patterns were characterized using a Bruker D2 instrument with Cu  $\text{K}\alpha$  radiation, with  $2\theta$  scanning from 5° to 60°. Chemical bonds and functional

groups of the samples were analyzed using a Nicolet iS 10 Fourier transform infrared spectrometer. Film morphology was observed by field-emission scanning electron microscopy (FE-SEM, SU8010, Hitachi, Japan). Surface roughness was examined using a Bruker Dimension Icon atomic force microscope (AFM). UV-Vis spectrophotometry (Lambda 950, Perkin-Elmer Co.) was employed to characterize film transmittance and absorption spectra. X-ray photoelectron spectroscopy (XPS) was performed with Thermo Scientific ESCALAB 250Xi X-ray photoelectron spectrometer. Steady-state photoluminescence (PL) was measured using an FLS920 transient optical spectrometer (Edinburgh Instruments, UK). Current density-voltage (J-V) curves were recorded under AM 1.5 G illumination using a digital source meter (Keithley 2400), with light intensity calibrated to  $100\text{mW cm}^{-2}$ . Electrochemical impedance spectroscopy (EIS) was performed in the dark using a Zahner-Elektrik workstation (Germany). Contact angles of different ETLs were characterized using an AST VCA Optima XE droplet shape analyzer. Film thermal conductivity was measured with a thermal conductivity instrument (TC3000E, Xiayi Electronic Technology).

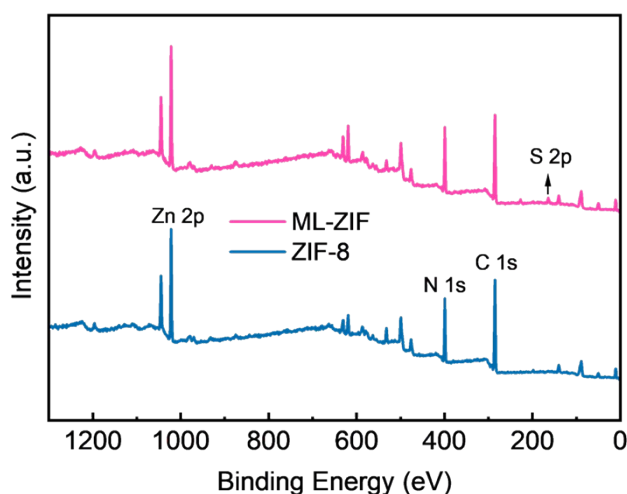

**Fig. S1** XPS survey of ZIF-8 and ML-ZIF.

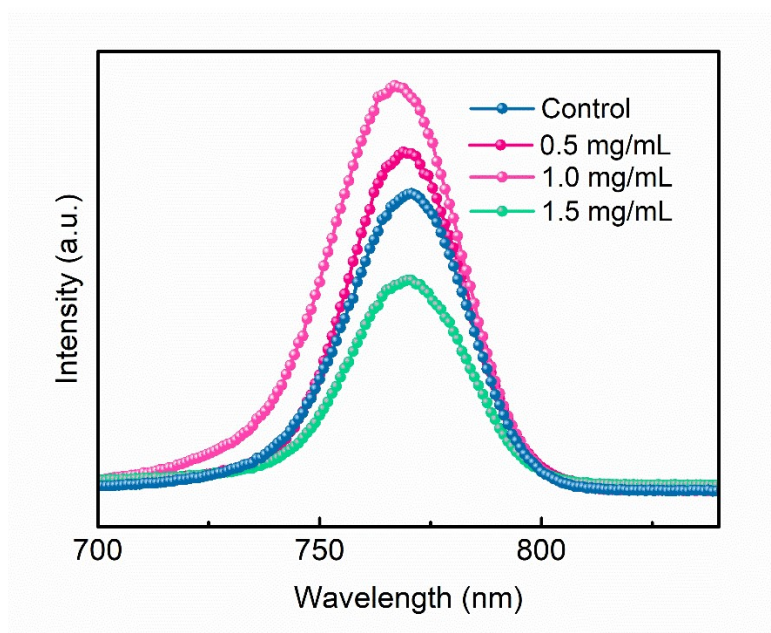

**Fig. S2** Steady-state PL emission spectra of perovskite films with different doping concentrations.

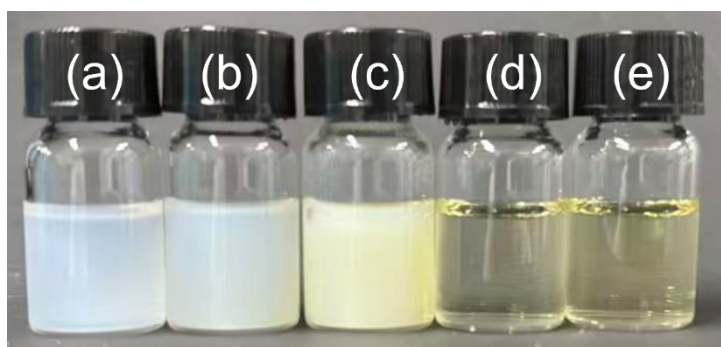

**Fig. S3** Photographs of the products obtained from different 2-MeIM to 2-MIM molar ratios: (a) 0:4, (b) 1:3, (c) 1:1, (d) 3:1, and (e) 4:0.

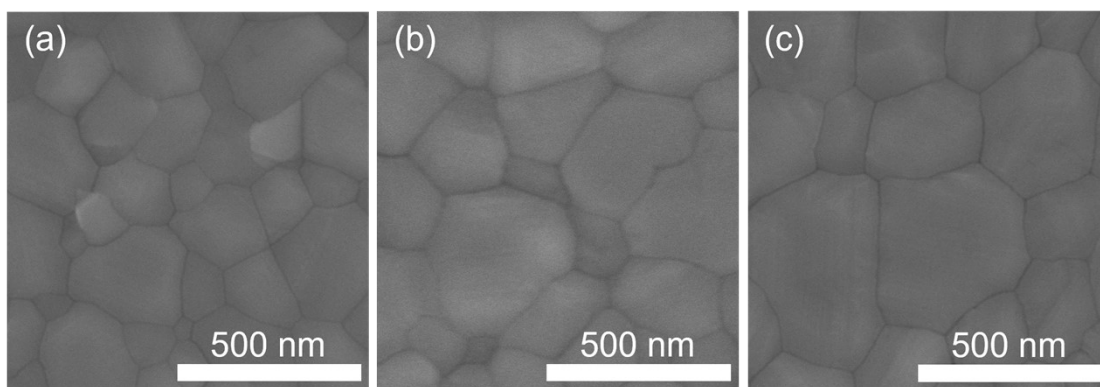

**Fig. S4** SEM images of perovskite films doped with 1.0 mg/mL (a) ZIF-8, (b) ML-ZIF (1:3) and (c) ML-ZIF (1:1).

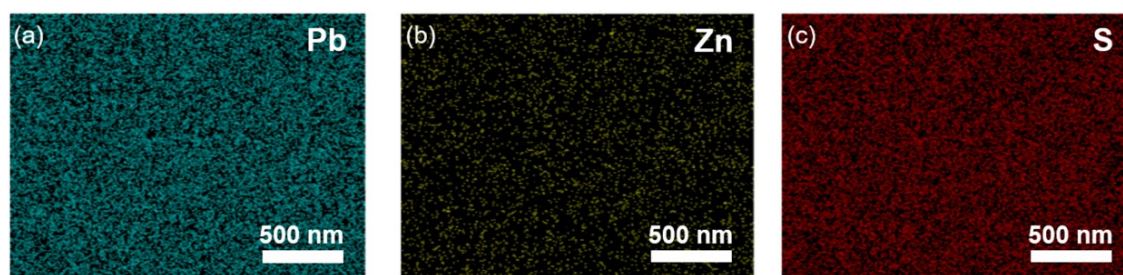

**Fig. S5** EDS mappings of (a) Pb, (b) Zn, (c) S elements on the surface of ML-ZIF doped perovskite film.

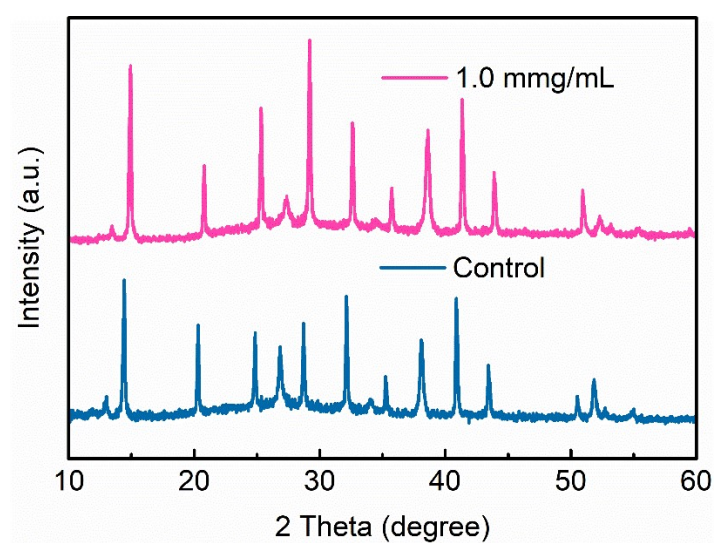

**Fig. S6** XRD patterns of the control and ML-ZIF doped perovskite films.

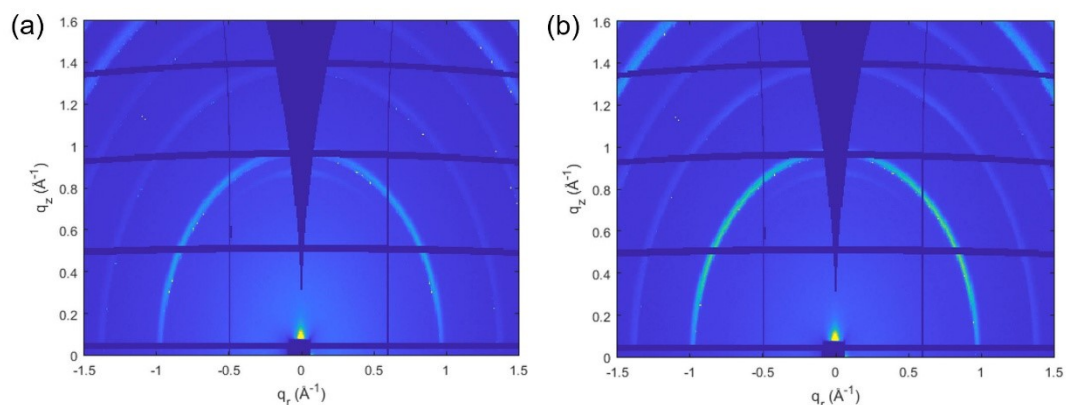

**Fig. S7** GIWAXS images of (a) control and (b) ML-ZIF-doped perovskite films.

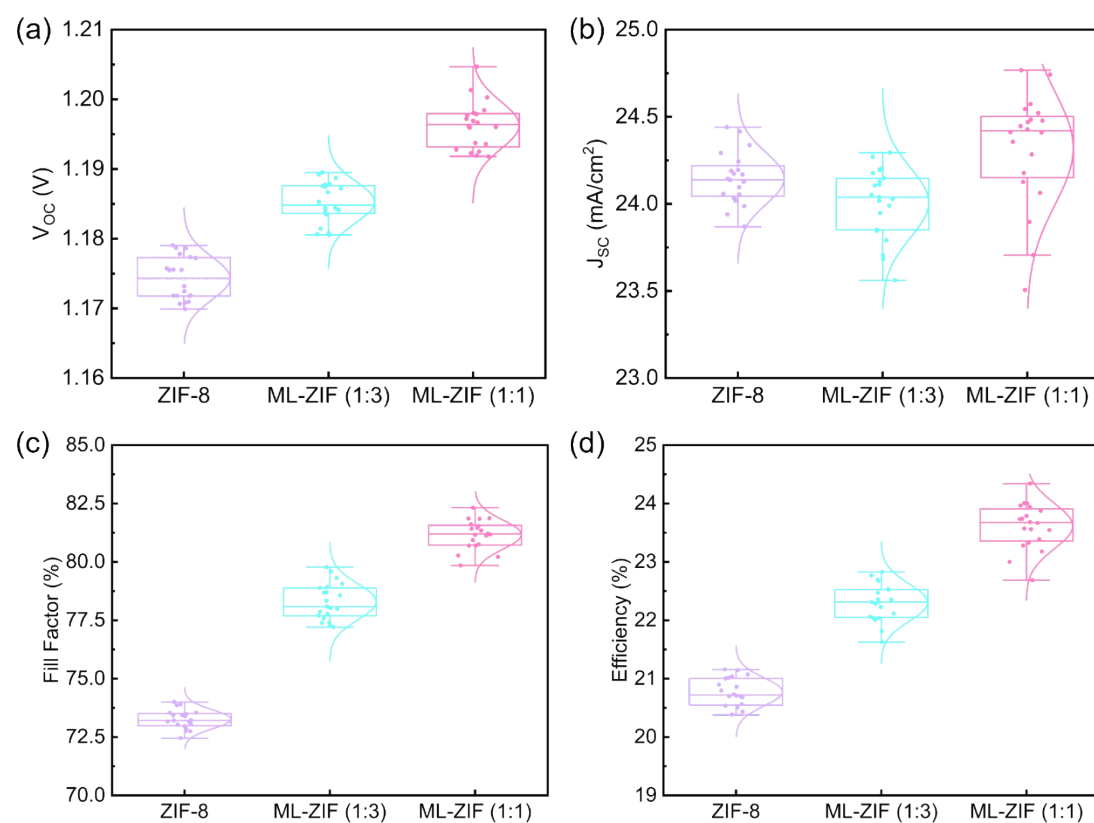

**Fig. S8** The statistical data of PSC performance of  $V_{OC}$  (a),  $J_{SC}$  (b), FF (c), and PCE (d) for ZIF-8, ML-ZIF (1:3), and ML-ZIF (1:1).

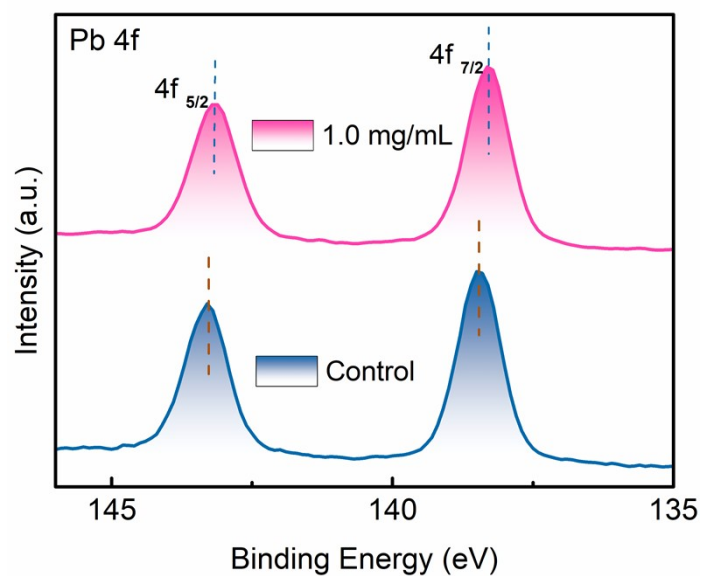

**Fig. S9** Pb 4f XPS spectra of control and ML-ZIF-doped perovskite films.

**Table S1** Photovoltaic parameters of the control and ML-ZIF-doped PSCs.

| Samples |         | $V_{oc}$ (V) | $J_{sc}$ (mA cm <sup>-2</sup> ) | FF (%) | PCE (%) |
|---------|---------|--------------|---------------------------------|--------|---------|
| Control | Reverse | 1.154        | 23.44                           | 79.5   | 21.52   |
|         | Forward | 1.130        | 23.26                           | 78.6   | 20.66   |
| ML-ZIF  | Reverse | 1.199        | 24.45                           | 82.3   | 24.12   |
|         | Forward | 1.196        | 24..48                          | 81.1   | 23.74   |
